# Supplementary material for: Internet-based self-management support for adults with asthma: a qualitative study among patients, general practitioners and practice nurses on barriers to implementation
Source: PubMed Central journal article supplement — BMJ Open. 2016 Aug 25;6(8):e010809. doi: 10.1136/bmjopen-2015-010809 (PMC5013403; doi:10.1136/bmjopen-2015-010809), 2016-08-25
Supplement: bmjopen-2015-010809supp1.pdf [file bmjopen-2015-010809supp1.pdf]

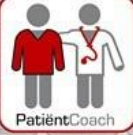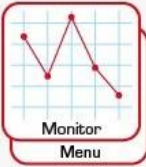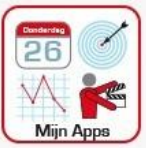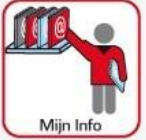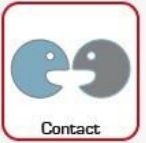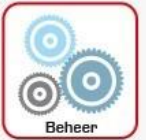

### Monitoren van gezondheid

Astma Controle (ACQ6)

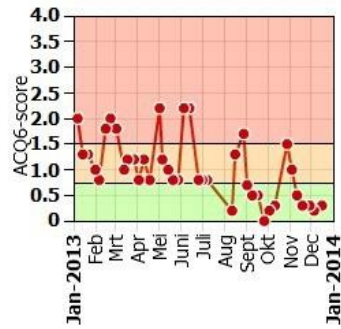

- Start hier nieuwe ACQ6-meting
- Bekijk in detail

Astma Controle (ACQ7)

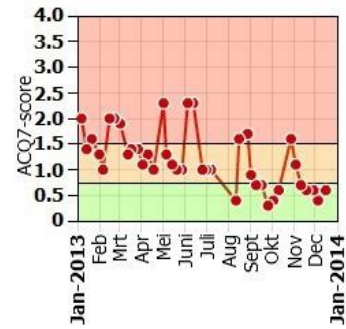

- Start hier nieuwe ACQ7-meting
- Bekijk in detail

Astmamedicatiestap

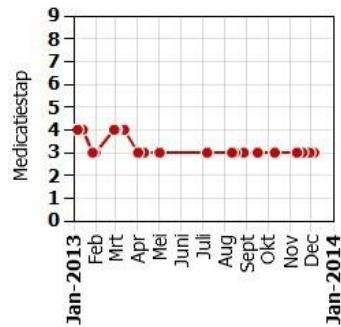

- Bekijk in detail

Longfunctie

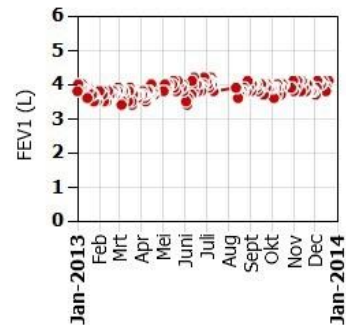

- Start hier nieuwe longfunctiemeting
- Bekijk in detail
