# Supplementary material for: Internet-based self-management support for adults with asthma: a qualitative study among patients, general practitioners and practice nurses on barriers to implementation
Source: PubMed Central journal article supplement — BMJ Open. 2016 Aug 25;6(8):e010809. doi: 10.1136/bmjopen-2015-010809 (PMC5013403; doi:10.1136/bmjopen-2015-010809), 2016-08-25
Supplement: bmjopen-2015-010809supp2.pdf [file bmjopen-2015-010809supp2.pdf]

## **Supplementary file 2. Topic guide**

### **PATIENTS**

#### **Current asthma management**

Could you describe how you currently manage your asthma?

#### **Internet-based self-management support (IBSM)**

- How do you feel about a web-based tool to support your asthma management?
- Demonstration of internet-based self-management support (PatientCoach) and explanation of functionalities
- How do you feel about PatientCoach?
- Please give your positive and/or negative comments

#### **Internet-based self-management support within general practice**

If your general practitioner and/or practice nurse would invite you to use this program, would you be willing to use it?

- If yes, please explain why.
- If no, please explain why. Could you think of any possible solution?

#### **What would you need for using PatientCoach to manage your asthma?**

### **GENERAL PRACTITIONERS AND PRACTICE NURSES**

#### **Current asthma care**

Could you describe current asthma care for adults within your practice  
What is the role of self-management within current asthma care?

#### **Internet-based self-management (IBSM) support**

- How do you feel about internet-based self-management support?
- Demonstration of internet-based self-management support (PatientCoach) and explanation of functionalities
- How do you feel about PatientCoach?
- Please give your positive and/or negative comments.

#### **Internet-based self-management support within general practice**

- If you would be given the opportunity to use PatientCoach for asthma within your practice would you be willing to use it?
  - If yes, please explain why
  - If no, please explain why. Could you think of any possible solution?
- What would you need for using PatientCoach within your practice?
